# Supplementary material for: Investigation on Metabolites in Structure and Biosynthesis from the Deep-Sea Sediment-Derived Actinomycete Janibacter sp. SCSIO 52865
Source: MDPI journal article supplement (doi:10.3390/molecules28052133), 2023-02-24

# Supplementary data for

## Investigation on Metabolites in Structure and Biosynthesis from the Deep-Sea Sediment-Derived Actinomycete *Janibacter* sp. SCSIO 52865

Wenping Ding <sup>1</sup>, Yanqun Li <sup>1</sup>, Xinpeng Tian <sup>1</sup>, Zhihui Xiao <sup>1</sup>, Ru Li <sup>1</sup>, Si Zhang <sup>1,2,\*</sup>,  
Hao Yin <sup>1,2,3,\*</sup>

<sup>1</sup> CAS Key Laboratory of Tropical Marine Bio-resources and Ecology, South China Sea Institute of  
Oceanology, Chinese Academy of Sciences, Guangzhou 510301, China

<sup>2</sup> Southern Marine Science and Engineering Guangdong Laboratory (Guangzhou), Guangzhou  
511458, China

<sup>3</sup> Sanya Institute of Ocean Eco-Environmental Engineering, Sanya 57200, China

### Content

|                                                                                                                                                    |    |
|----------------------------------------------------------------------------------------------------------------------------------------------------|----|
| Table S1. Compositions of eleven liquid media.....                                                                                                 | 3  |
| Figure S1. HPLC analysis profiles of EtOAc extracts from eleven media.....                                                                         | 4  |
| Figure S2. Integrated cluster-node diagram of molecular networking .....                                                                           | 7  |
| Figure S3. Circular genome map of SCSIO 52865 .....                                                                                                | 7  |
| Table S2. The putative secondary metabolite biosynthetic gene clusters from SCSIO 52865 using<br>antiSMASH platform .....                          | 8  |
| Figure S4. The four secondary metabolite biosynthetic gene clusters from SCSIO 52865 .....                                                         | 8  |
| Table S3. The key genes information from SCSIO 52865 .....                                                                                         | 8  |
| Table S4. Predicted function of the open reading frames .....                                                                                      | 9  |
| Figure S5. The biosynthesis of unsaturated fatty acid using KEGG annotation .....                                                                  | 9  |
| Figure S6. HRESIMS spectrum of compound 1 .....                                                                                                    | 10 |
| Figure S7. <sup>1</sup> H NMR spectrum (CD <sub>3</sub> OD, 500 MHz) of compound 1 .....                                                           | 10 |
| Figure S8. <sup>13</sup> C NMR and DEPT spectra (CD <sub>3</sub> OD, 126 MHz) of compound 1 .....                                                  | 11 |
| Figure S9. HSQC spectrum of compound 1 .....                                                                                                       | 11 |
| Figure S10. HMBC spectrum of compound 1 .....                                                                                                      | 12 |
| Figure S11. <sup>1</sup> H– <sup>1</sup> H COSY spectrum of compound 1 .....                                                                       | 12 |
| Figure S12. NOESY spectrum of compound 1 .....                                                                                                     | 13 |
| Figure S13. UV spectrum of compound 1 .....                                                                                                        | 13 |
| Figure S14. IR spectrum of compound 1 .....                                                                                                        | 14 |
| Table S5. <sup>1</sup> H and <sup>13</sup> C NMR data of compounds 2–3 (Methanol- <i>d</i> <sub>4</sub> , $\delta$ in ppm, <i>J</i> in Hz). .....  | 15 |
| Table S6. <sup>1</sup> H and <sup>13</sup> C NMR data of compounds 4–5 (Methanol- <i>d</i> <sub>4</sub> , $\delta$ in ppm, <i>J</i> in Hz). .....  | 16 |
| Table S7. <sup>1</sup> H and <sup>13</sup> C NMR data of compound 6 (Methanol- <i>d</i> <sub>4</sub> , $\delta$ in ppm, <i>J</i> in Hz). .....     | 17 |
| Table S8. <sup>1</sup> H and <sup>13</sup> C NMR data of compounds 7–8 (Methanol- <i>d</i> <sub>4</sub> , $\delta$ in ppm, <i>J</i> in Hz). .....  | 18 |
| Table S9. <sup>1</sup> H and <sup>13</sup> C NMR data of compounds 9–10 (Methanol- <i>d</i> <sub>4</sub> , $\delta$ in ppm, <i>J</i> in Hz). ..... | 19 |
| Table S10. <sup>1</sup> H and <sup>13</sup> C NMR data of compound 11 (Chloroform- <i>d</i> , $\delta$ in ppm, <i>J</i> in Hz). .....              | 19 |
| Table S11. <sup>1</sup> H and <sup>13</sup> C NMR data of compounds 12–13 (Chloroform- <i>d</i> , $\delta$ in ppm, <i>J</i> in Hz). .....          | 20 |

|                                                                                                                             |    |
|-----------------------------------------------------------------------------------------------------------------------------|----|
| Table S12. $^1\text{H}$ and $^{13}\text{C}$ NMR data of compounds 14–15 (Chloroform- $d$ , $\delta$ in ppm, $J$ in Hz)..... | 21 |
| Table S13. Inhibitory effects of compounds 1–15, and acarbose against $\alpha$ -glucosidase.....                            | 22 |
| Figure S15. GC-MS spectrum of compound 12 .....                                                                             | 23 |
| Figure S16. GC-MS spectrum of compound 13 .....                                                                             | 24 |
| Figure S17. GC-MS spectrum of compound 14 .....                                                                             | 25 |
| Figure S18. GC-MS spectrum of compound 15 .....                                                                             | 26 |
| Figure S19. HPLC analysis profiles of Marfey's derivatives of 1, 2, and 5–7 at 340 nm.....                                  | 27 |

**Table S1.** Compositions of eleven liquid media

| Media    | Compositions                                                                                                                                                                                                                                                                                          |
|----------|-------------------------------------------------------------------------------------------------------------------------------------------------------------------------------------------------------------------------------------------------------------------------------------------------------|
| 1 mA     | Glucose (10 g/L), Yeast extract (5 g/L), Soluble starch (12 g/L), Bacterial peptone (5 g/L), NaCl (4 g/L), KH <sub>2</sub> PO <sub>4</sub> (0.5 g/L), MgSO <sub>4</sub> •7H <sub>2</sub> O (0.5 g/L), CaCO <sub>3</sub> (2 g/L), Sea salt (30 g/L).                                                   |
| 2 mK     | Yeast extract (2 g/L), Bacterial peptone (2 g/L), Glucose (2 g/L), Mannitol (3 g/L), Malt extract (5 g/L), Peptone from soybean (5 g/L), Soluble starch (5 g/L), Sea salt (30 g/L).                                                                                                                   |
| 3 m2216E | 2216E (37.4 g/L), Glucose (15 g/L), Sea salt (30 g/L).                                                                                                                                                                                                                                                |
| 4 mAm2ab | Soluble starch (5 g/L), Peptone from soybean (5 g/L), Glucose (20 g/L), Yeast extract (2 g/L), Bacterial peptone (2 g/L), KH <sub>2</sub> PO <sub>4</sub> (1 g/L), MgSO <sub>4</sub> •7H <sub>2</sub> O (0.5 g/L), CaCO <sub>3</sub> (2 g/L), Sea salt (30 g/L).                                      |
| 5 mBHI   | BHI broth (38.5 g/L), Sea salt (30 g/L).                                                                                                                                                                                                                                                              |
| 6 mISP2  | Yeast extract (4 g/L), Malt extract (10 g/L), Glucose (4 g/L), Sea salt (30 g/L).                                                                                                                                                                                                                     |
| 7 mISP4  | Soluble starch (10 g/L), KH <sub>2</sub> PO <sub>4</sub> (2 g/L), MgSO <sub>4</sub> •7H <sub>2</sub> O (1 g/L), NaCl (1 g/L), (NH <sub>4</sub> ) <sub>2</sub> SO <sub>4</sub> (2 g/L), CaCO <sub>3</sub> (3 g/L), TS (1 mL/L), Yeast extract (0.5 g/L), Bacterial peptone (1 g/L), Sea salt (30 g/L). |
| 8 mRA    | Soluble starch (20 g/L), Glucose (10 g/L), Malt extract (10 g/L), Maltose (10 g/L), Corn steep liquor (5 g/L), CaCO <sub>3</sub> (2 g/L), Sea salt (30 g/L).                                                                                                                                          |
| 9 mJNP1A | Soluble starch (20 g/L), Peptone of fish powder (2 g/L), Trehalose Dihydrate (2 g/L), Beef extract (3 g/L), Sea salt (30 g/L).                                                                                                                                                                        |
| 10 mM20  | Soybean flour (15 g/L), Soluble starch (20 g/L), Yeast extract (5 g/L), Bacterial peptone (2 g/L), NaCl (4 g/L), CaCO <sub>3</sub> (2 g/L), Sea salt (30 g/L).                                                                                                                                        |
| 11 mMCQ1 | Soluble starch (10 g/L), Glucose (10 g/L), Bacterial peptone (5 g/L), Yeast extract (3 g/L), Beef extract (2 g/L), KH <sub>2</sub> PO <sub>4</sub> (0.5 g/L), MgSO <sub>4</sub> •7H <sub>2</sub> O (0.5 g/L), KBr (1 g/L), CaCO <sub>3</sub> (2 g/L), Sea salt (30 g/L).                              |

TS: Trace salts solution, FeSO<sub>4</sub>•7H<sub>2</sub>O 0.1 g, MnCl<sub>2</sub>•4H<sub>2</sub>O 0.1 g, ZnSO<sub>4</sub>•7H<sub>2</sub>O 0.1 g, in H<sub>2</sub>O 100 mL.

**Figure S1.** HPLC analysis profiles of EtOAc extracts from eleven media

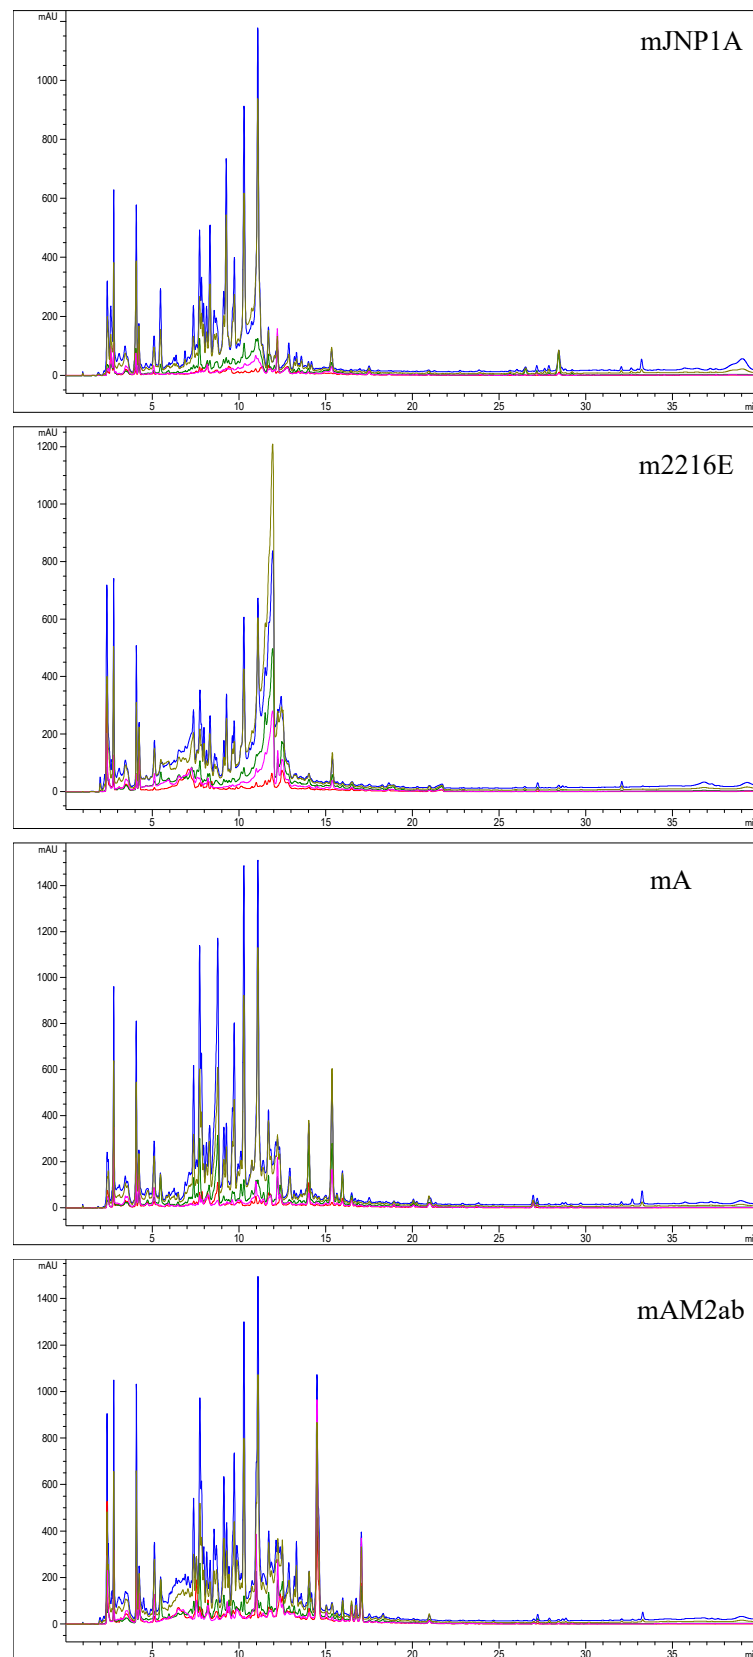



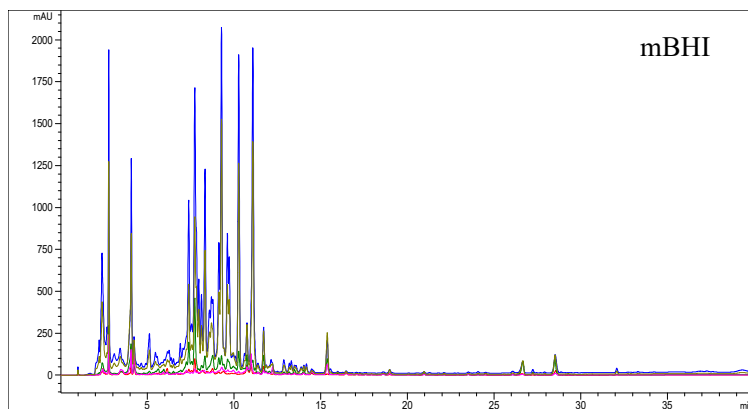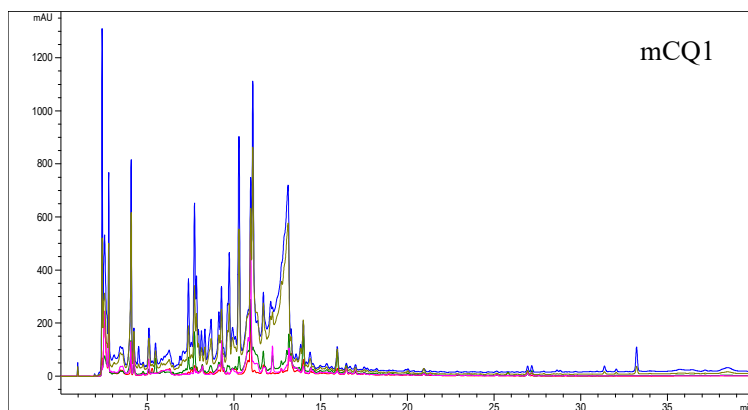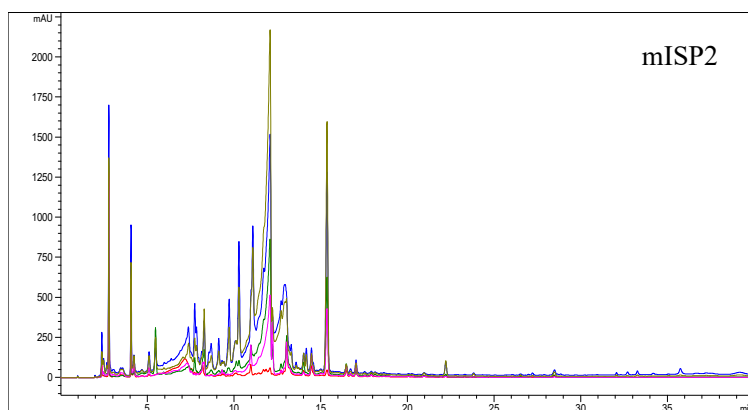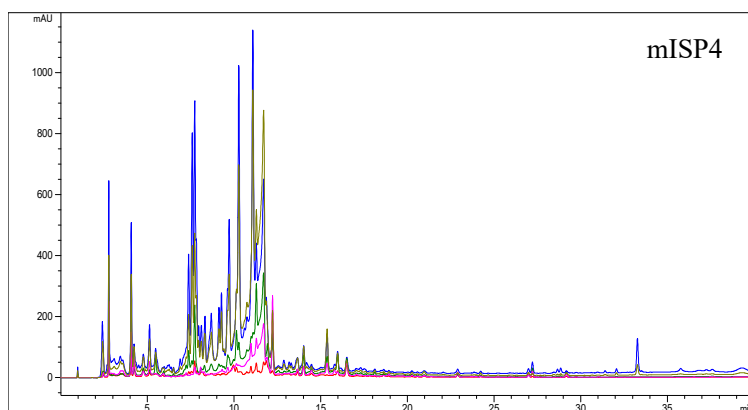

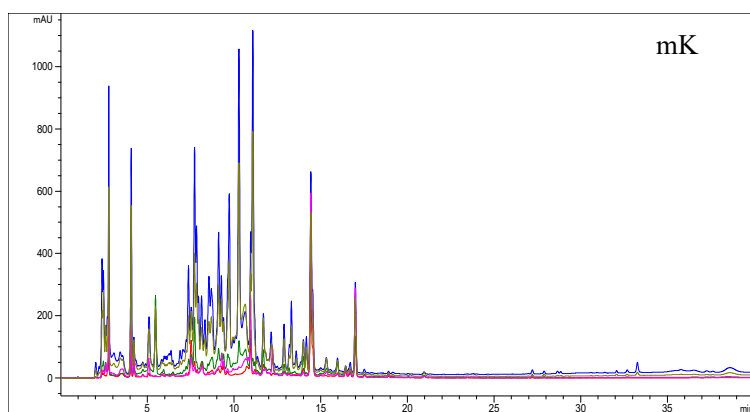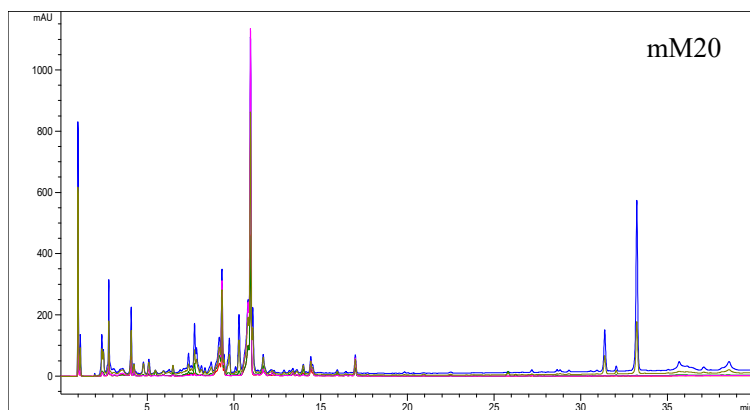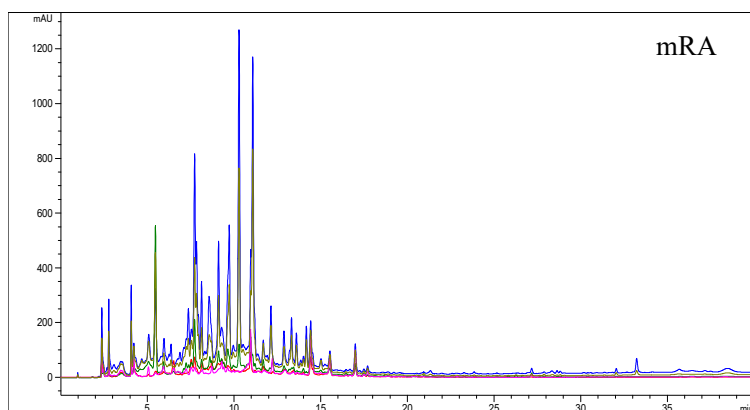

UV detection at 202 nm (blue), 210 nm (yellow), 230 nm (green), 254 nm (pink) and 280 nm (red).

**Figure S2.** Integrated cluster-node diagram of molecular networking

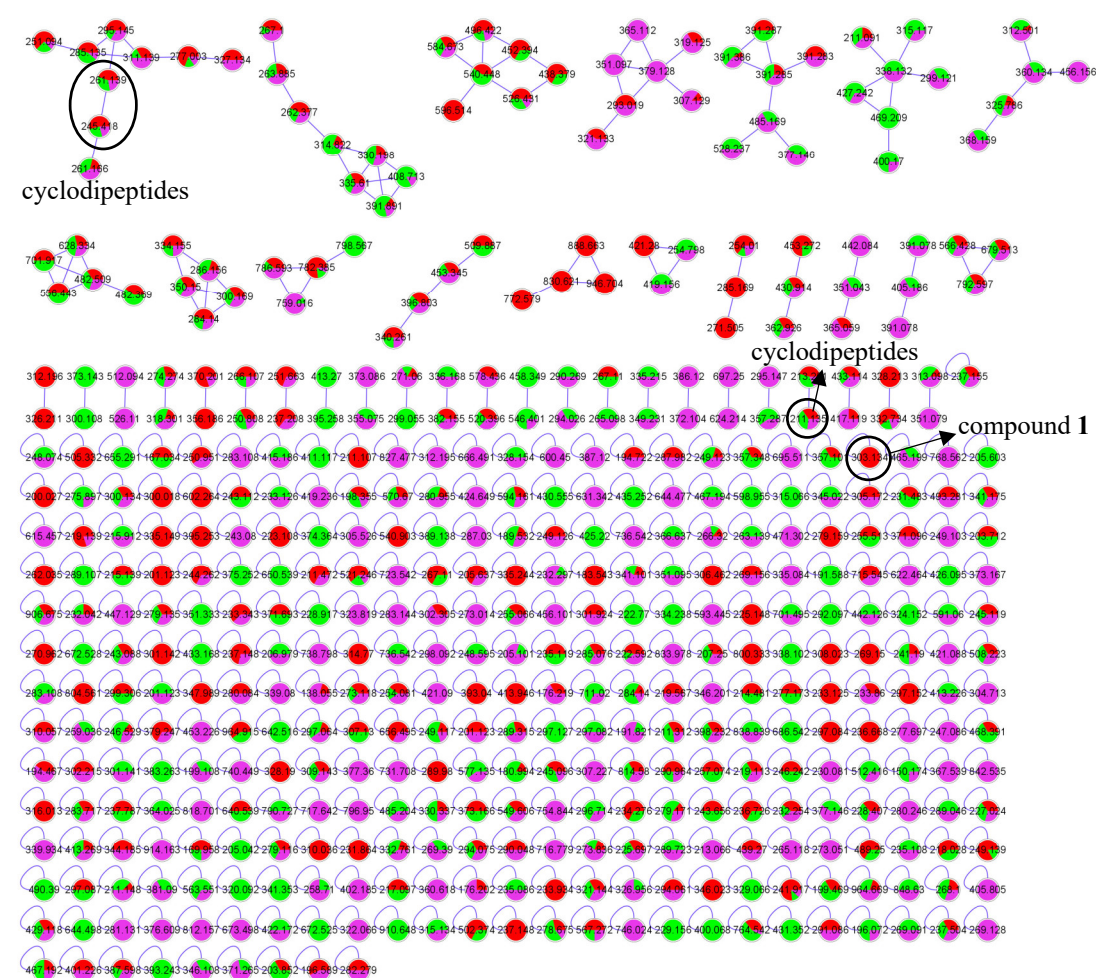

**Figure S3.** Circular genome map of SCSIO 52865

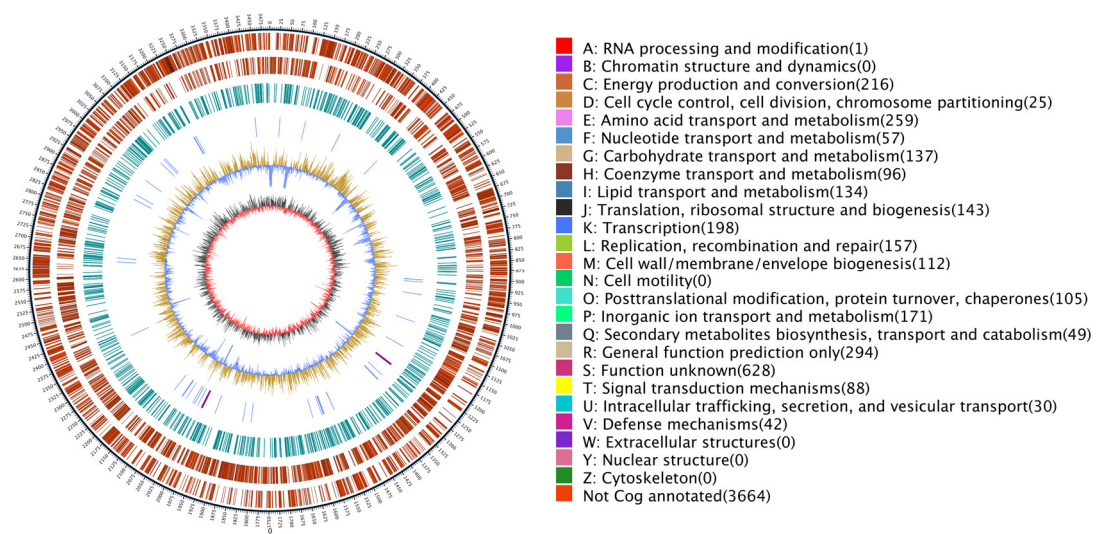

**Table S2.** The putative secondary metabolite biosynthetic gene clusters from SCSIO 52865 using antiSMASH platform

| Regions | Types     | Location                 | Total     |
|---------|-----------|--------------------------|-----------|
| 1.1     | T3PKS     | 360,465 - 401,553 nt     | 41,089 nt |
| 1.2     | ectoine   | 971,706 - 982,101 nt     | 10,396 nt |
| 1.3     | terpene   | 2,030,508 - 2,051,371 nt | 20,864 nt |
| 1.4     | NPRS-like | 3,332,428 - 3,375,034 nt | 42,607 nt |

**Figure S4.** The four secondary metabolite biosynthetic gene clusters from SCSIO 52865

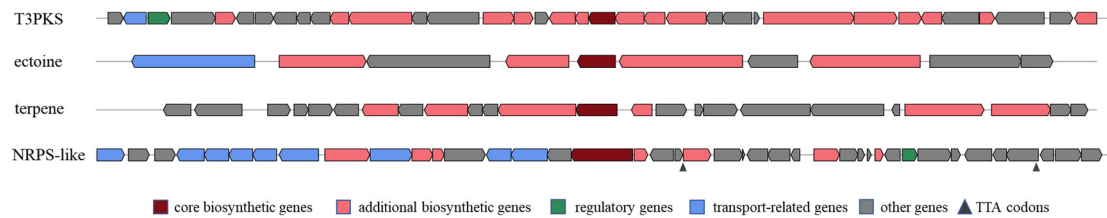

**Table S3.** The key genes information from SCSIO 52865

| Gene     | Orientation | Location                          | Swissprot_target_ID    | E-value   | Identity | Cover  |
|----------|-------------|-----------------------------------|------------------------|-----------|----------|--------|
| jatA     | (-)         | 3352428 - 3355034<br>(2607 nt)    | P80574(AROF_STR<br>CO) | 3.00E-157 | 61.24%   | 94.57% |
| jatB     | (+)         | 3355098 - 3355670<br>(573 nt)     | Q6AF95(AROB_LE<br>IXX) | 1.00E-128 | 65.72%   | 99.43% |
| jatC     | (-)         | 3355770 - 3356753<br>(984 nt)     | staT                   | 6E-04     | 46.15%   | 15%    |
| jatD     | (+)         | 3356812 - 3357147<br>(336 nt)     | A0QRD3(MENB_M<br>YCS2) | 6.30E-124 | 74.33%   | 97.99% |
| GE001391 | (+)         | 1,522,183 - 1,523,133<br>(951 nt) | tesB                   | 3.7E-50   | 40.82%   | 82.91% |
| GE000333 | (+)         | 363,533- 365,320<br>(1788 nt)     | proS                   | 1.1E-239  | 69.7%    | 99.5%  |
| GE002558 | (-)         | 2,717,282-2,717,749<br>(468 nt)   | proS                   | 1.20E-06  | 32.61%   | 59.35% |

**Table S4.** Predicted function of the open reading frames

| Protein | Amino Acids<br>(AA) | Putative Function                  | Homolog (Enzyme, Origin) |                                      | AA cover/<br>identity | Ref.           |
|---------|---------------------|------------------------------------|--------------------------|--------------------------------------|-----------------------|----------------|
| JatA    | 869                 | Non-ribosomal peptide synthetase   | PltF                     | [ <i>Pseudomonas protegens</i> ]     | 40%/30.93%            | Q4KCY5.1       |
| JatB    | 191                 | 4'-phosphopantetheinyl transferase | hypothetical protein     | [ <i>Actinomadura atramentaria</i> ] | 78%/41.71%            | WP_019630033.1 |
| JatC    | 328                 | Acetyltransferase                  | hypothetical protein     | [ <i>Marihabitans asiaticum</i> ]    | 93%/56.03%            | WP_170236173.1 |
| JatD    | 112                 | Ferredoxin                         | FdxA                     | [ <i>Mycobacterium smegmatis</i> ]   | 95%/74.53%            | P00215.1       |

**Figure S5.** The biosynthesis of unsaturated fatty acid using KEGG annotation

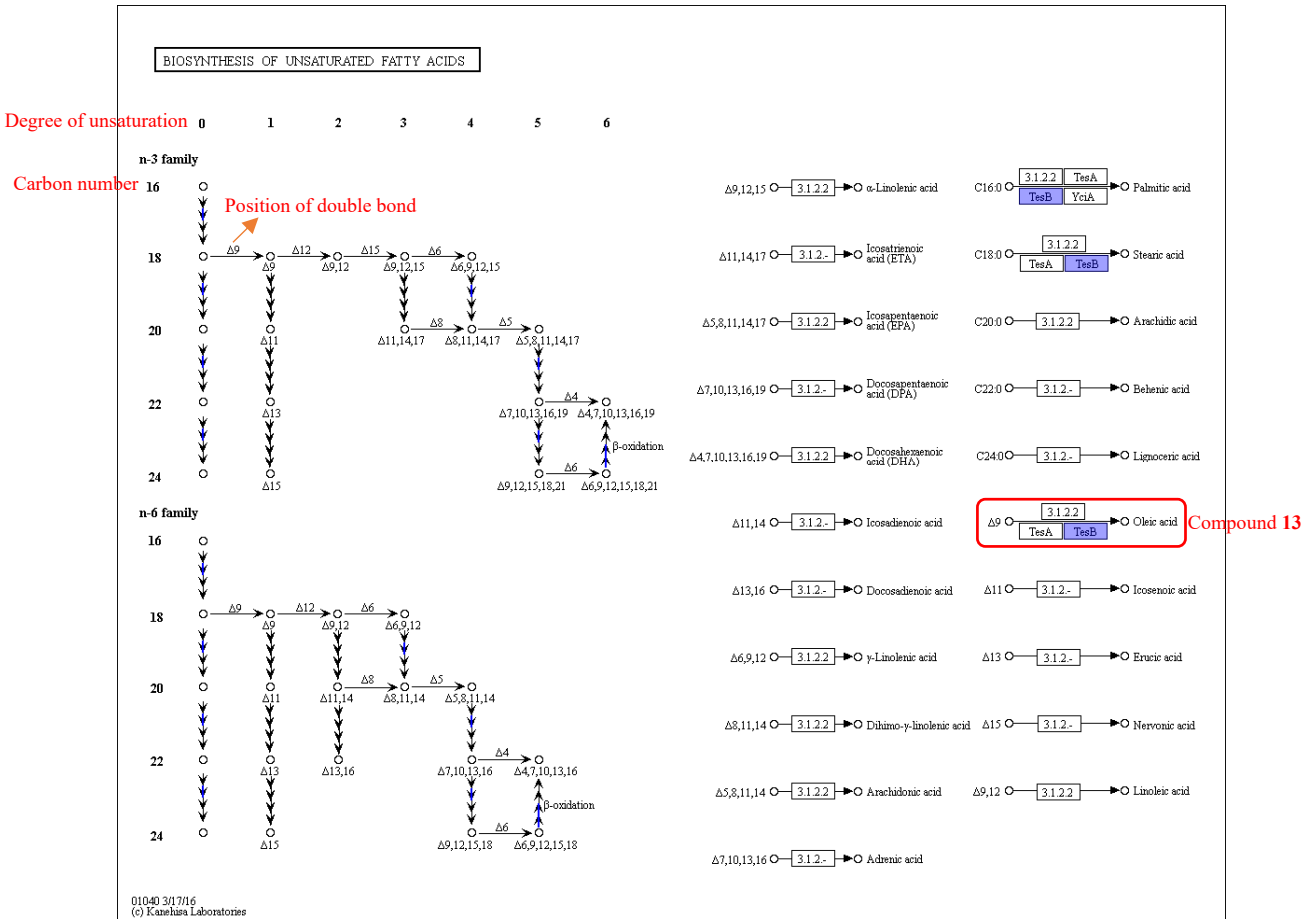

TesB (highlighted in blue): Acyl-CoA thioesterase II. n-3 or n-6 family: a family of fatty acids has a double bond between C-3 and C-4, or C-6 and C-7, counting from the terminal methyl.

**Figure S6.** HRESIMS spectrum of compound **1**

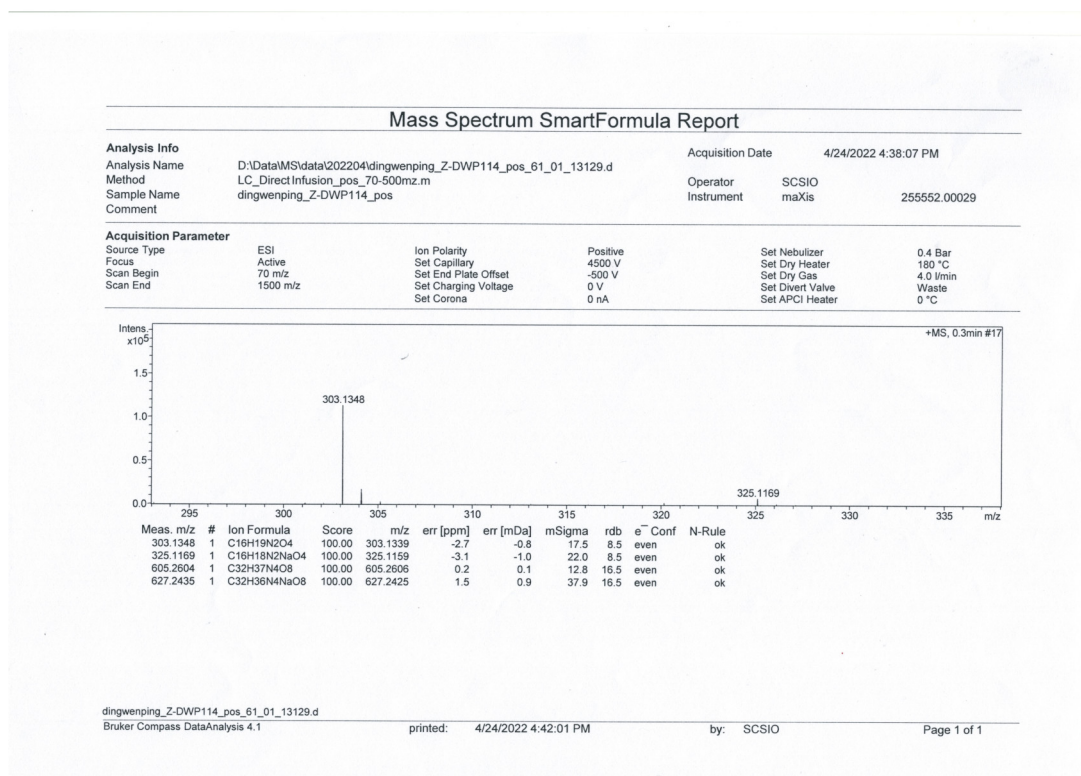

**Figure S7.** <sup>1</sup>H NMR spectrum (CD<sub>3</sub>OD, 500 MHz) of compound **1**

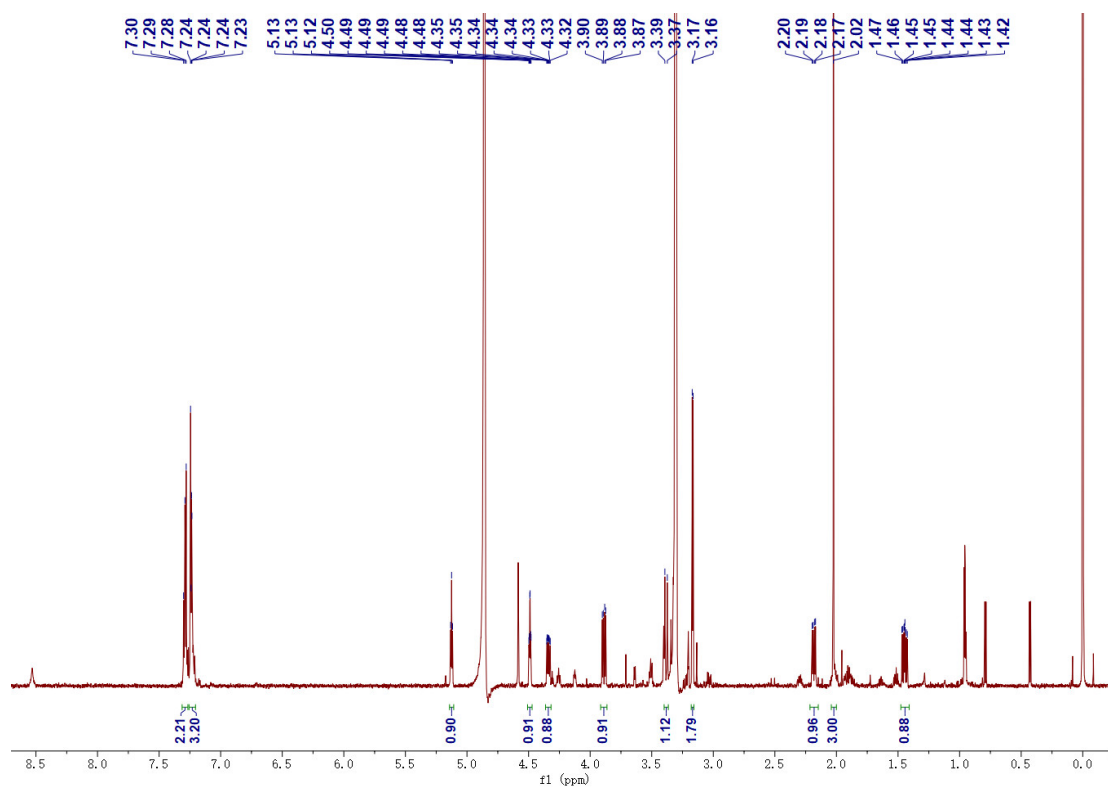

**Figure S8.**  $^{13}\text{C}$  NMR and DEPT spectra ( $\text{CD}_3\text{OD}$ , 126 MHz) of compound **1**

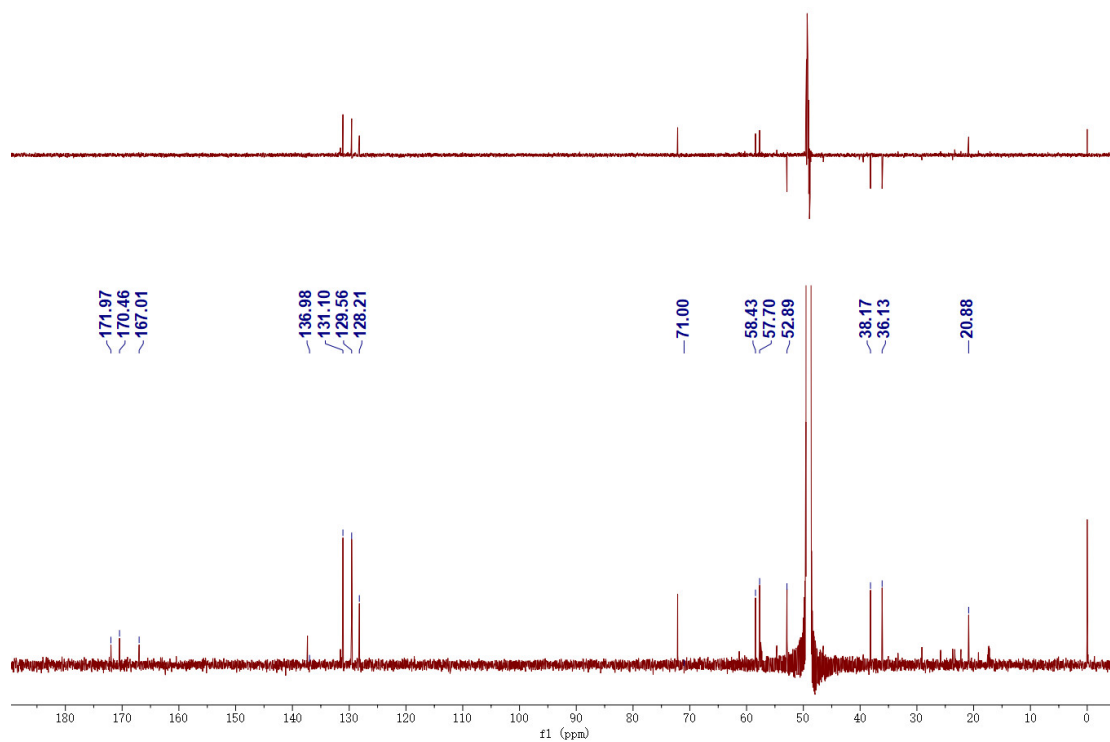

**Figure S9.** HSQC spectrum of compound **1**

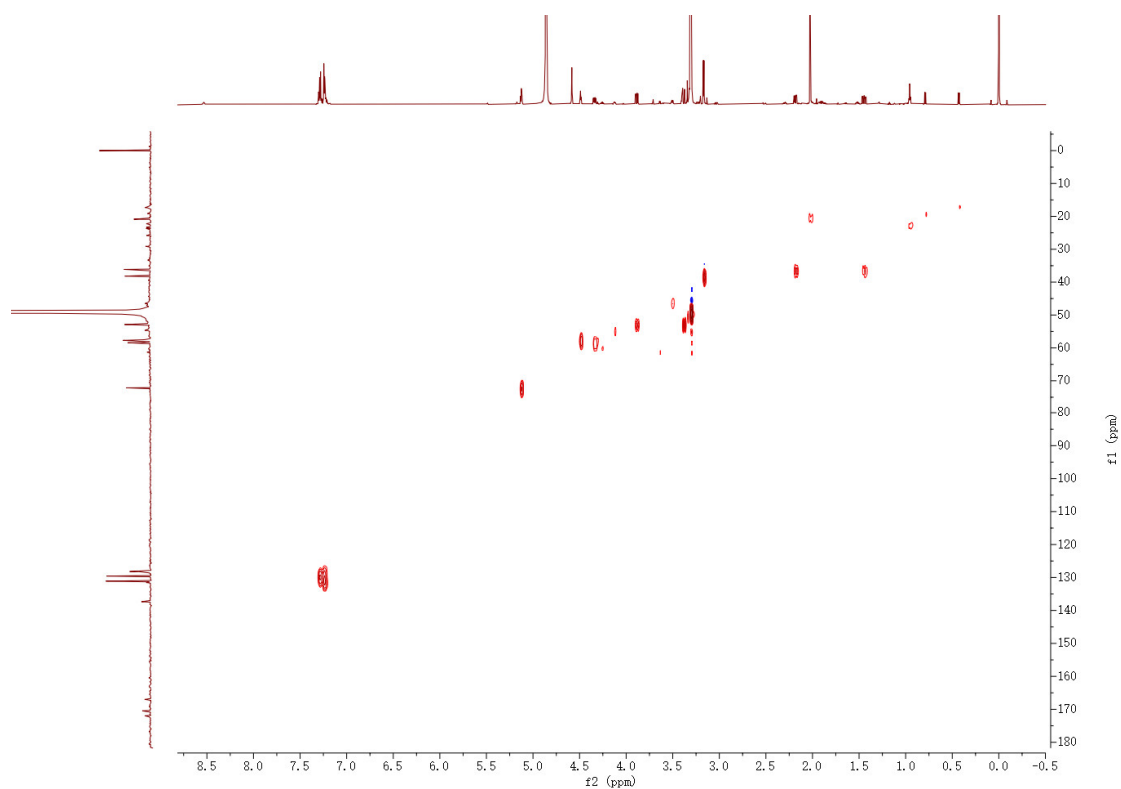



**Figure S10.** HMBC spectrum of compound **1**

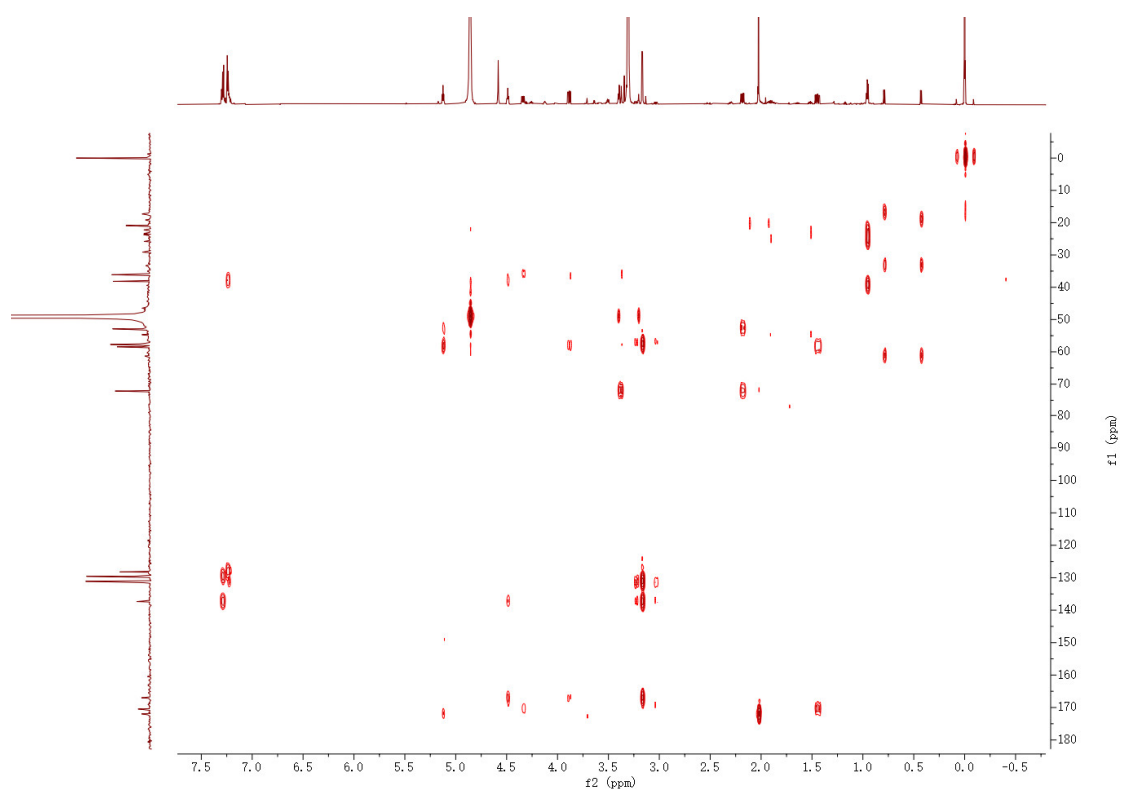

**Figure S11.**  $^1\text{H}$ – $^1\text{H}$  COSY spectrum of compound **1**

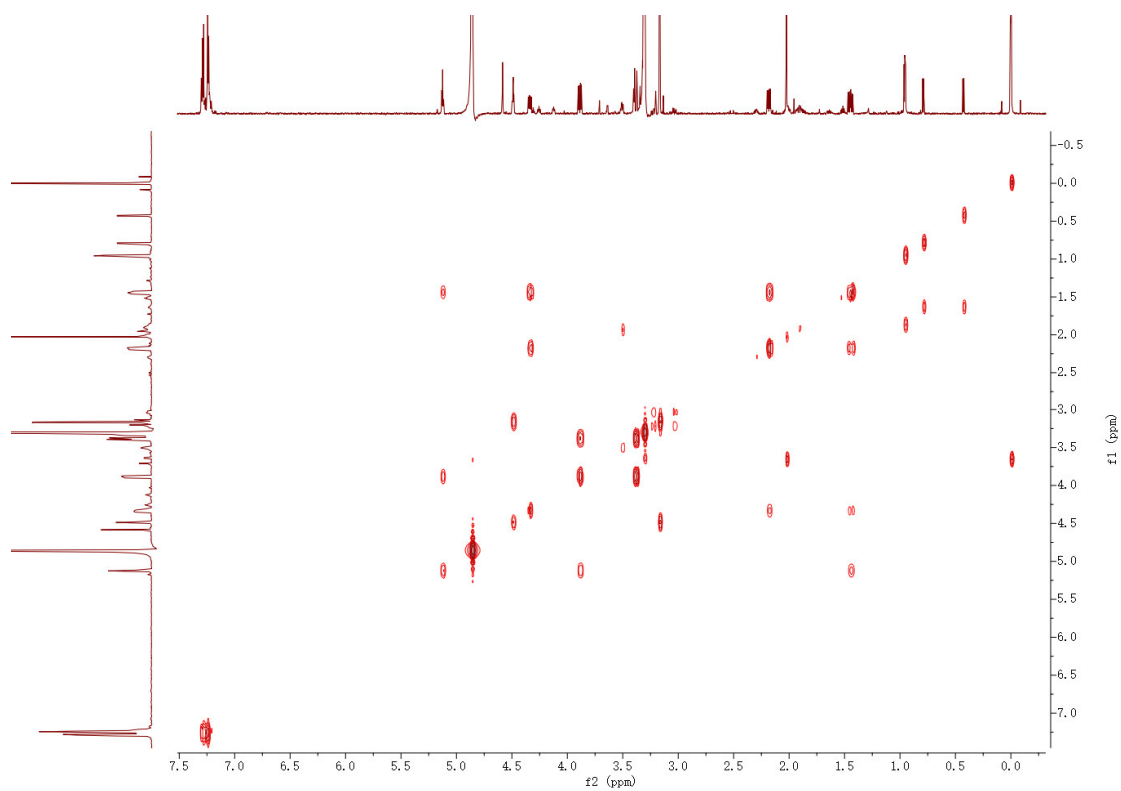



**Figure S12.** NOESY spectrum of compound **1**

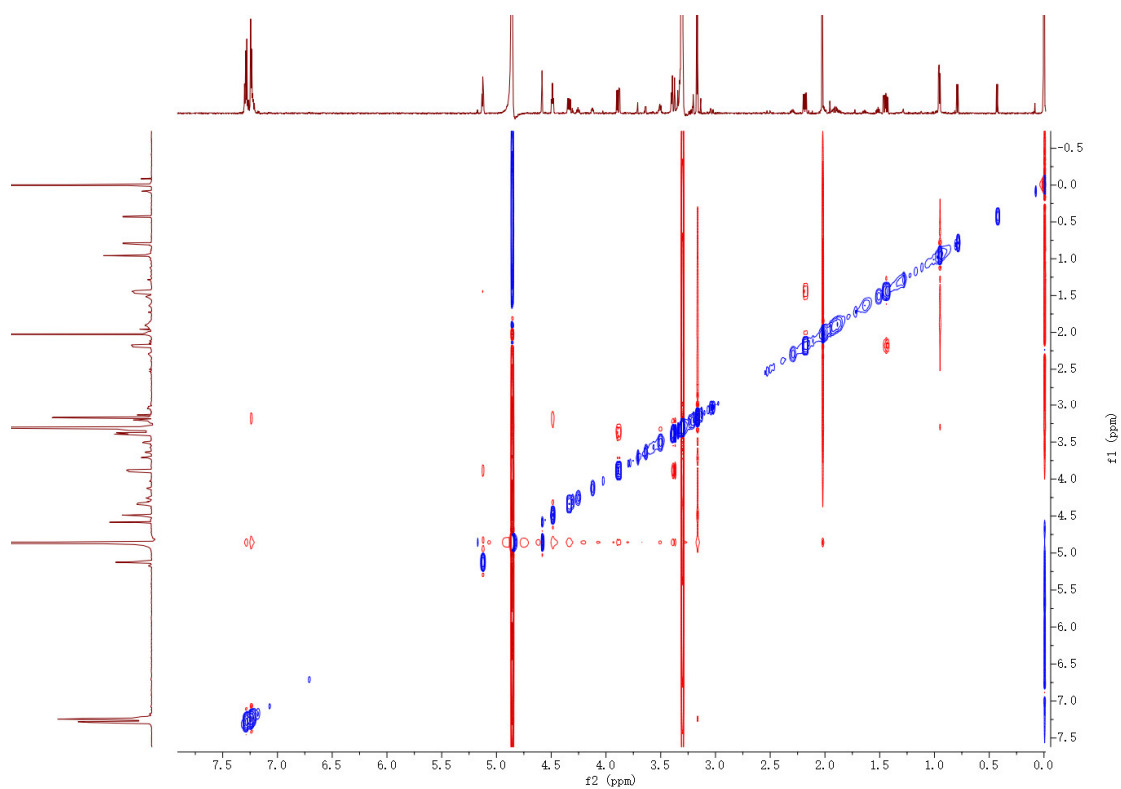

**Figure S13.** UV spectrum of compound **1**

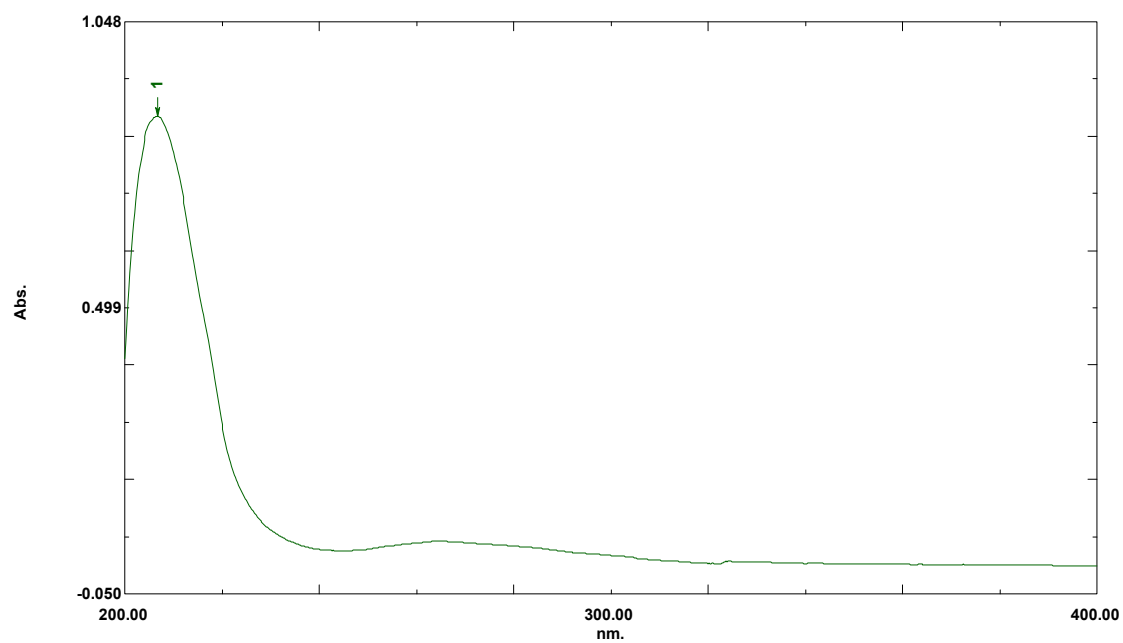

| No. | wavelength (nm) | Abs   |
|-----|-----------------|-------|
| 1   | 206.80          | 0.867 |

**Figure S14.** IR spectrum of compound **1**

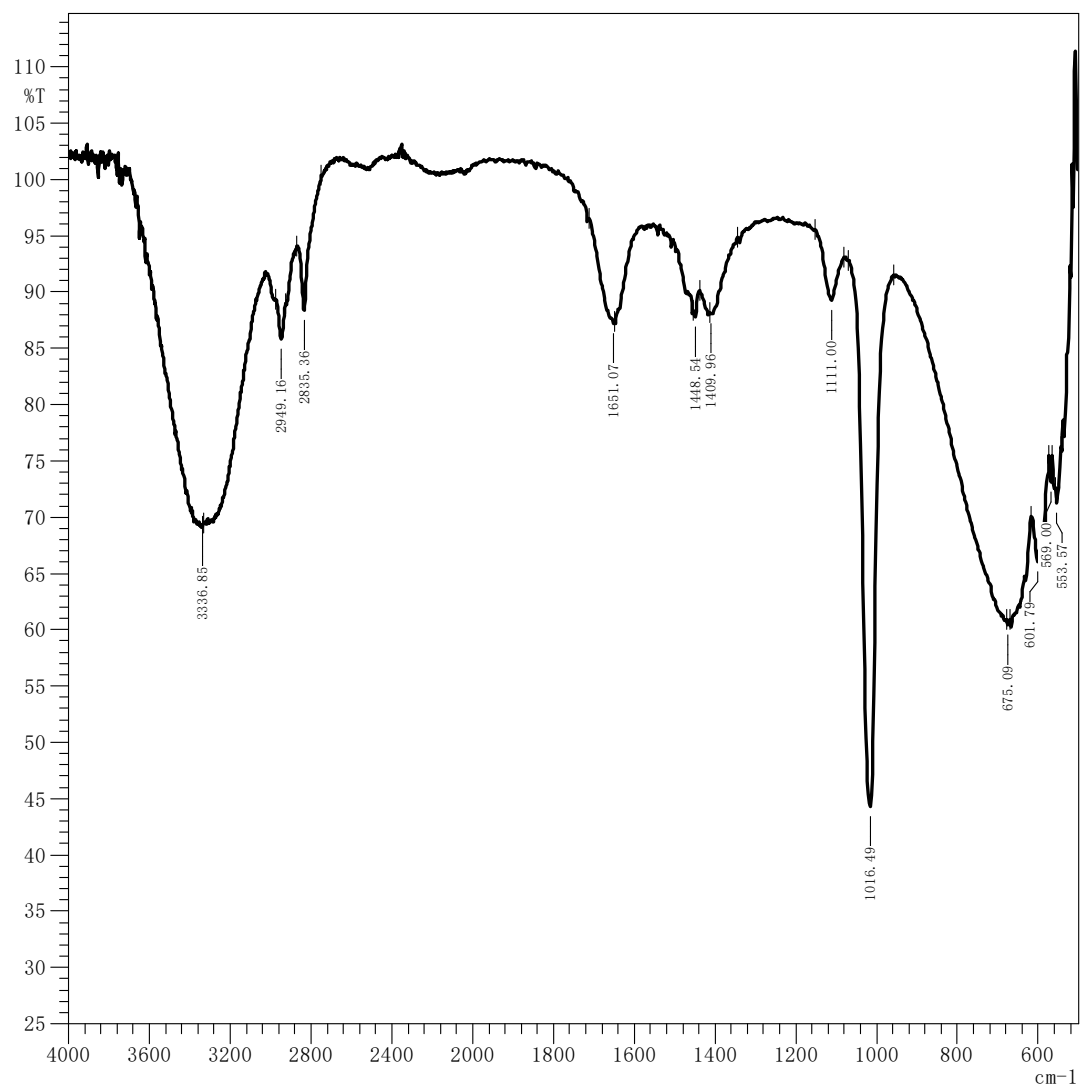

**Table S5.**  $^1\text{H}$  and  $^{13}\text{C}$  NMR data of compounds **2–3** (Methanol- $d_4$ ,  $\delta$  in ppm,  $J$  in Hz).

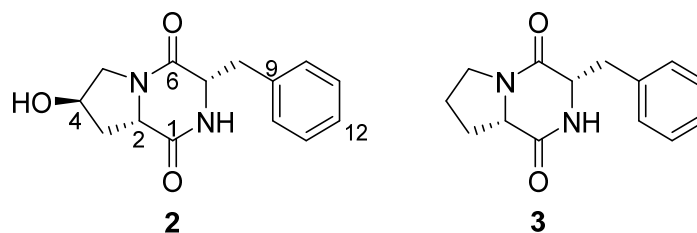

| Position | <b>2<sup>a</sup></b>                                       |                     | <b>3<sup>b</sup></b>                             |                     |
|----------|------------------------------------------------------------|---------------------|--------------------------------------------------|---------------------|
|          | $\delta_{\text{H}}$                                        | $\delta_{\text{C}}$ | $\delta_{\text{H}}$                              | $\delta_{\text{C}}$ |
| 1        |                                                            | 171.3, s            |                                                  | 170.9, s            |
| 2        | 4.36 (ddd, 11.8, 6.0, 2.0)                                 | 58.4, d             | 4.07 (ddd, 10.8, 6.4, 1.9)                       | 60.1, d             |
| 3        | 2.06 (ddt, 12.9, 5.8, 1.3),<br>1.37 (ddd, 13.0, 11.7, 4.6) | 38.0, t             | 2.09 (dtd, 12.3, 6.3, 4.4),<br>1.81 (overlapped) | 29.4, t             |
| 4        | 4.28 (t, 4.8)                                              | 68.6, d             | 1.81 (overlapped), 1.23 (m)                      | 22.8, t             |
| 5        | 3.70 (dd, 12.9, 5.2),<br>3.29 (d, 13.1)                    | 55.3, t             | 3.54 (dt, 11.9, 8.3),<br>3.36 (m)                | 46.0, t             |
| 6        |                                                            | 167.1, s            |                                                  | 166.9, s            |
| 7        | 4.48 (td, 5.1, 1.9)                                        | 57.6, d             | 4.44 (td, 5.1, 1.9)                              | 57.7, d             |
| 8        | 3.17 (m)                                                   | 38.9, t             | 3.16 (m)                                         | 38.2, t             |
| 9        |                                                            | 137.4, s            |                                                  | 137.4, s            |
| 10, 14   | 7.21-7.29 (overlapped)                                     | 131.1, d            | 7.21-7.30 (overlapped)                           | 131.1, d            |
| 11, 13   | 7.21-7.29 (overlapped)                                     | 129.5, d            | 7.21-7.30 (overlapped)                           | 129.5, d            |
| 12       | 7.21-7.29 (overlapped)                                     | 128.1, d            | 7.21-7.30 (overlapped)                           | 128.1, d            |

<sup>a</sup>  $^1\text{H}$  and  $^{13}\text{C}$  NMR data were recorded at 700 MHz and 176 MHz, respectively.

<sup>b</sup>  $^1\text{H}$  and  $^{13}\text{C}$  NMR data were recorded at 500 MHz and 126 MHz, respectively.

**Table S6.**  $^1\text{H}$  and  $^{13}\text{C}$  NMR data of compounds **4–5** (Methanol- $d_4$ ,  $\delta$  in ppm,  $J$  in Hz).

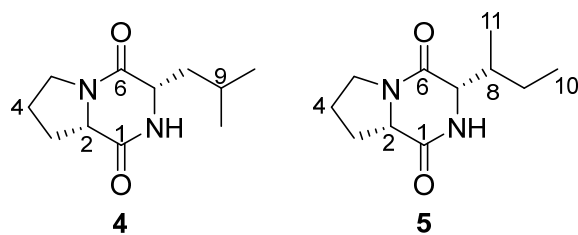

| Position | <b>4<sup>a</sup></b>             |                     | <b>5<sup>a</sup></b>   |                     |
|----------|----------------------------------|---------------------|------------------------|---------------------|
|          | $\delta_{\text{H}}$              | $\delta_{\text{C}}$ | $\delta_{\text{H}}$    | $\delta_{\text{C}}$ |
| 1        |                                  | 172.8, s            |                        | 167.6, s            |
| 2        | 4.30 (ddd, 9.3, 7.0, 1.8)        | 60.3, d             | 4.21 (m)               | 61.3, d             |
| 3        | 2.33 (m), 1.92-2.09 (overlapped) | 29.1, t             | 2.06-2.46 (overlapped) | 29.6, t             |
| 4        | 1.92-2.09 (overlapped)           | 23.7, t             | 2.06-2.46 (overlapped) | 23.3, t             |
| 5        | 3.55 (m)                         | 46.5, t             | 3.63-3.95 (overlapped) | 46.2, t             |
| 6        |                                  | 168.9, s            |                        | 172.5, s            |
| 7        | 4.16 (m)                         | 54.6, d             | 4.32 (m)               | 60.0, d             |
| 8        | 1.92-2.09 (overlapped), 1.55 (m) | 39.4, t             | 2.06-2.46 (overlapped) | 37.1, d             |
| 9        | 1.92-2.09 (overlapped)           | 25.8, d             | 1.57 (m), 1.46 (m)     | 25.5, t             |
| 10       | 1.00 (d, 6.3)                    | 23.4, q             | 1.06 (overlapped)      | 12.6, q             |
| 11       | 0.99 (d, 6.2)                    | 22.3, q             | 1.20 (overlapped)      | 15.6, q             |

<sup>a</sup>  $^1\text{H}$  and  $^{13}\text{C}$  NMR data were recorded at 500 MHz and 126 MHz, respectively.

**Table S7.**  $^1\text{H}$  and  $^{13}\text{C}$  NMR data of compound **6** (Methanol- $d_4$ ,  $\delta$  in ppm,  $J$  in Hz).

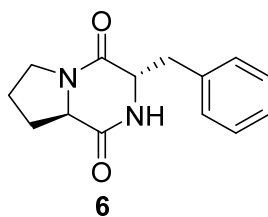

| <b>6<sup>a</sup></b> |                                            |                     |
|----------------------|--------------------------------------------|---------------------|
| Position             | $\delta_{\text{H}}$                        | $\delta_{\text{C}}$ |
| 1                    |                                            | 171.3, s            |
| 2                    | 2.66 (10.7, 6.3)                           | 59.1, d             |
| 3                    | 2.07 (m), 1.70 (m)                         | 29.8, t             |
| 4                    | 1.93 (m), 1.64 (overlapped)                | 22.5, t             |
| 5                    | 3.56 (dt, 12.2, 8.5), 3.35 (m)             | 46.2, t             |
| 6                    |                                            | 167.4, s            |
| 7                    | 4.23 (t, 4.7)                              | 59.8, d             |
| 8                    | 3.22 (dd, 13.7, 4.9), 3.03 (dd, 13.7, 4.7) | 41.0, t             |
| 9                    |                                            | 136.7, s            |
| 10, 14               | 7.22 (dd, 6.6, 3.0)                        | 131.3, d            |
| 11, 13               | 7.33 (overlapped)                          | 129.7, d            |
| 12                   | 7.33 (overlapped)                          | 128.5, d            |

<sup>a</sup>  $^1\text{H}$  and  $^{13}\text{C}$  NMR data were recorded at 500 MHz and 126 MHz, respectively.

**Table S8.**  $^1\text{H}$  and  $^{13}\text{C}$  NMR data of compounds **7–8** (Methanol- $d_4$ ,  $\delta$  in ppm,  $J$  in Hz).

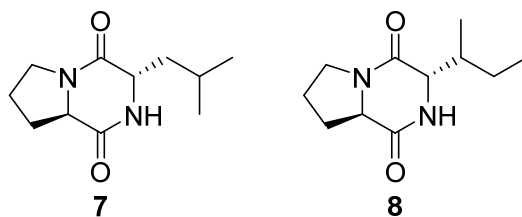

| Position | <b>7<sup>a</sup></b>        |                     | <b>8<sup>a</sup></b> |                     |
|----------|-----------------------------|---------------------|----------------------|---------------------|
|          | $\delta_{\text{H}}$         | $\delta_{\text{C}}$ | $\delta_{\text{H}}$  | $\delta_{\text{C}}$ |
| 1        |                             | 171.6, s            |                      | 171.6, s            |
| 2        | 4.30 (dd, 9.8, 6.6)         | 59.4, d             | 4.27 (dd, 9.9, 6.4)  | 59.8, d             |
| 3        | 2.37 (m), 2.06 (m)          | 29.9, t             | 2.38 (m), 2.05 (m)   | 30.3, t             |
| 4        | 1.96 (overlapped)           | 23.1, t             | 1.93 (overlapped)    | 22.9, t             |
| 5        | 3.61 (m), 3.53 (m)          | 46.7, t             | 3.63 (m), 3.52 (m)   | 46.8, t             |
| 6        |                             | 169.1, s            |                      | 167.9, s            |
| 7        | 3.88 (dd, 9.5, 5.4)         | 57.1, d             | 3.71 (d, 6.3)        | 63.5, d             |
| 8        | 1.71 (ddd, 13.5, 9.5, 5.5), | 43.7, t             |                      |                     |
|          | 1.61 (ddd, 13.7, 8.5, 5.4)  |                     | 1.93 (overlapped)    | 41.0, d             |
| 9        | 1.80 (m)                    | 25.6, d             | 1.63 (m), 1.26 (m)   | 26.1, t             |
| 10       | 1.03 (d, 6.6)               | 23.4, q             | 0.98 (t, 7.4)        | 11.6, q             |
| 11       | 1.00 (d, 6.6)               | 22.0, q             | 1.03 (d, 6.9)        | 15.7, q             |

<sup>a</sup>  $^1\text{H}$  and  $^{13}\text{C}$  NMR data were recorded at 500 MHz and 126 MHz, respectively.

**Table S9.**  $^1\text{H}$  and  $^{13}\text{C}$  NMR data of compounds **9–10** (Methanol- $d_4$ ,  $\delta$  in ppm,  $J$  in Hz).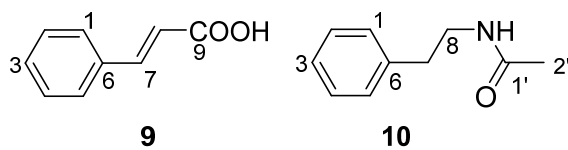

| <b>9<sup>a</sup></b> |                     |                     | <b>10<sup>a</sup></b> |                     |                     |
|----------------------|---------------------|---------------------|-----------------------|---------------------|---------------------|
| Position             | $\delta_{\text{H}}$ | $\delta_{\text{C}}$ | Position              | $\delta_{\text{H}}$ | $\delta_{\text{C}}$ |
| 1, 5                 | 7.59 (dd, 7.5, 2.1) | 129.2, d            | 1, 5                  | 7.27 (m)            | 129.5, d            |
| 2, 4                 | 7.39 (overlapped)   | 130.0, d            | 2, 4                  | 7.21 (m)            | 129.8, d            |
| 3                    | 7.39 (overlapped)   | 131.3, d            | 3                     | 7.18 (m)            | 127.4, d            |
| 6                    |                     | 136.0, s            | 6                     |                     | 140.6, s            |
| 7                    | 7.65 (d, 16.0)      | 145.9, d            | 7                     | 2.78 (t, 7.4)       | 36.5, t             |
| 8                    | 6.48 (d, 16.0)      | 120.0, d            | 8                     | 3.38 (m)            | 42.2, t             |
| 9                    |                     | 170.9, d            | 1'                    |                     | 173.3, s            |
|                      |                     |                     | 2'                    | 1.90 (s)            | 22.5, q             |

<sup>a</sup>  $^1\text{H}$  and  $^{13}\text{C}$  NMR data were recorded at 700 MHz and 176 MHz, respectively.

**Table S10.**  $^1\text{H}$  and  $^{13}\text{C}$  NMR data of compound **11** (Chloroform- $d$ ,  $\delta$  in ppm,  $J$  in Hz).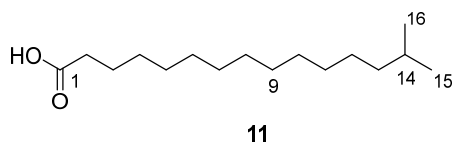

| <b>11</b> |                        |                     |
|-----------|------------------------|---------------------|
| Position  | $\delta_{\text{H}}$    | $\delta_{\text{C}}$ |
| 1         |                        | 180.5, s            |
| 2         | 2.38 (t, 7.5)          | 34.1, t             |
| 3         | 1.67 (m)               | 24.7, t             |
| 4-11      | 1.29-1.39 (overlapped) | 29.1-30.0, t        |
| 12        | 1.29-1.39 (overlapped) | 27.5, t             |
| 13        | 1.19 (m)               | 39.1, t             |
| 14        | 1.55 (m)               | 28.0, d             |
| 15        | 0.90 (d, 6.7)          | 22.7, q             |
| 16        | 0.90 (d, 6.7)          | 22.7, q             |

$^1\text{H}$  and  $^{13}\text{C}$  NMR data were recorded at 500 MHz and 126 MHz, respectively.

**Table S11.**  $^1\text{H}$  and  $^{13}\text{C}$  NMR data of compounds **12–13** (Chloroform-*d*,  $\delta$  in ppm, *J* in Hz).

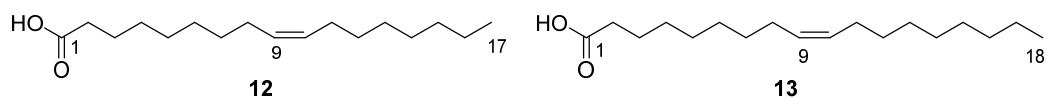

| Position | <b>12<sup>a</sup></b>  |                     | <b>13<sup>a</sup></b>  |                     |
|----------|------------------------|---------------------|------------------------|---------------------|
|          | $\delta_{\text{H}}$    | $\delta_{\text{C}}$ | $\delta_{\text{H}}$    | $\delta_{\text{C}}$ |
| 1        |                        | 180.5, s            |                        | 180.4, s            |
| 2        | 2.38 (t, 7.5)          | 34.2, t             | 2.38 (t, 7.5)          | 34.2, t             |
| 3        | 1.67 (m)               | 24.7, t             | 1.67 (m)               | 24.7, t             |
| 4        | 1.29-1.38 (overlapped) | 29.1-29.3, t        | 1.30-1.38 (overlapped) | 29.0-29.1, t        |
| 5        | 1.29-1.38 (overlapped) | 29.1-29.3, t        | 1.30-1.38 (overlapped) | 29.0-29.1, t        |
| 6        | 1.29-1.38 (overlapped) | 29.1-29.3, t        | 1.30-1.38 (overlapped) | 29.4-29.6, t        |
| 7        | 1.29-1.38 (overlapped) | 29.7-29.8, t        | 1.30-1.38 (overlapped) | 29.7-29.8, t        |
| 8        | 2.05 (overlapped)      | 27.2-27.3, t        | 2.05 (overlapped)      | 27.2-27.3, t        |
| 9        | 5.38 (overlapped)      | 129.7, d            | 5.38 (overlapped)      | 129.8, d            |
| 10       | 5.38 (overlapped)      | 130.0, d            | 5.38 (overlapped)      | 130.0, d            |
| 11       | 2.05 (overlapped)      | 27.2-27.3, t        | 2.05 (overlapped)      | 27.2-27.3, t        |
| 12       | 1.29-1.38 (overlapped) | 29.7-29.8, t        | 1.30-1.38 (overlapped) | 29.7-29.8, t        |
| 13       | 1.29-1.38 (overlapped) | 29.1-29.3, t        | 1.30-1.38 (overlapped) | 29.4-29.6, t        |
| 14       | 1.29-1.38 (overlapped) | 29.1-29.3, t        | 1.30-1.38 (overlapped) | 29.4-29.6, t        |
| 15       | 1.29-1.38 (overlapped) | 31.9, t             | 1.30-1.38 (overlapped) | 29.0-29.1, t        |
| 16       | 1.29-1.38 (overlapped) | 22.7, t             | 1.30-1.38 (overlapped) | 32.0, t             |
| 17       | 0.91 (overlapped)      | 14.1, q             | 1.30-1.38 (overlapped) | 22.7, t             |
| 18       |                        |                     | 0.92 (t, 6.8)          | 14.1, q             |

<sup>a</sup>  $^1\text{H}$  and  $^{13}\text{C}$  NMR data were recorded at 500 MHz and 126 MHz, respectively.



**Table S12.**  $^1\text{H}$  and  $^{13}\text{C}$  NMR data of compounds **14**–**15** (Chloroform- $d$ ,  $\delta$  in ppm,  $J$  in Hz).

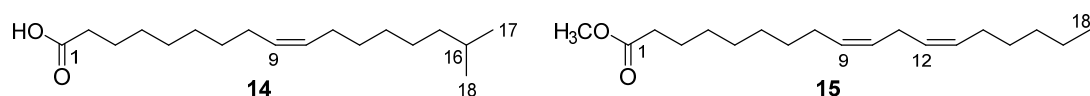

| Position         | <b>14<sup>a</sup></b>  |                     | <b>15<sup>b</sup></b>  |                     |
|------------------|------------------------|---------------------|------------------------|---------------------|
|                  | $\delta_{\text{H}}$    | $\delta_{\text{C}}$ | $\delta_{\text{H}}$    | $\delta_{\text{H}}$ |
| 1                |                        | 179.8, s            |                        | 174.3, s            |
| 2                | 2.39 (t, 7.5)          | 34.0, t             | 2.30 (t, 7.6)          | 34.1, t             |
| 3                | 1.67 (m)               | 24.7, t             | 1.62 (m)               | 25.0, t             |
| 4                | 1.29-1.39 (overlapped) | 29.0-29.2, t        | 1.26-1.37 (overlapped) | 29.1-29.6, t        |
| 5                | 1.29-1.39 (overlapped) | 29.0-29.2, t        | 1.26-1.37 (overlapped) | 29.1-29.6, t        |
| 6                | 1.29-1.39 (overlapped) | 29.0-29.2, t        | 1.26-1.37 (overlapped) | 29.1-29.6, t        |
| 7                | 1.29-1.39 (overlapped) | 29.6-29.8, t        | 1.26-1.37 (overlapped) | 29.1-29.6, t        |
| 8                | 2.05 (overlapped)      | 27.2-27.3, t        | 2.05 (overlapped)      | 27.2, t             |
| 9                | 5.38 (overlapped)      | 129.7, d            | 5.31-5.40 (overlapped) | 130.0, d            |
| 10               | 5.38 (overlapped)      | 130.0, d            | 5.31-5.40 (overlapped) | 127.9, d            |
| 11               | 2.05 (overlapped)      | 27.2-27.3, t        | 2.77 (t, 7.0)          | 25.6, t             |
| 12               | 1.29-1.39 (overlapped) | 29.6-29.8, t        | 5.31-5.40 (overlapped) | 128.0, d            |
| 13               | 1.29-1.39 (overlapped) | 29.6-29.8, t        | 5.31-5.40 (overlapped) | 130.2, d            |
| 14               | 1.29-1.39 (overlapped) | 27.2-27.3, t        | 2.05 (overlapped)      | 27.2, t             |
| 15               | 1.19 (m)               | 39.0, t             | 1.26-1.37 (overlapped) | 29.1-29.6, t        |
| 16               | 1.55 (m)               | 28.0, d             | 1.26-1.37 (overlapped) | 31.5, t             |
| 17               | 0.90 (d, 6.6)          | 22.7, q             | 1.26-1.37 (overlapped) | 22.6, t             |
| 18               | 0.90 (d, 6.6)          | 22.7, q             | 0.89 (t, 7.0)          | 14.1, q             |
| OCH <sub>3</sub> |                        |                     | 3.67 (s)               | 51.5, q             |

<sup>a</sup>  $^1\text{H}$  and  $^{13}\text{C}$  NMR data were recorded at 500 MHz and 126 MHz, respectively.

<sup>b</sup>  $^1\text{H}$  and  $^{13}\text{C}$  NMR data were recorded at 700 MHz and 176 MHz, respectively.

**Table S13.** Inhibitory effects of compounds **1–15**, and acarbose against  $\alpha$ -glucosidase

| Compounds <sup>a</sup> | Inhibition | Compounds <sup>a</sup> | Inhibition |
|------------------------|------------|------------------------|------------|
| <b>1</b>               | 4.16%      | <b>9</b>               | 6.58%      |
| <b>2</b>               | -7.96%     | <b>10</b>              | 3.23%      |
| <b>3</b>               | 0.58%      | <b>11</b>              | -2.77%     |
| <b>4</b>               | -9.70%     | <b>12</b>              | -39.03%    |
| <b>5</b>               | 1.27%      | <b>13</b>              | -22.17%    |
| <b>6</b>               | -9.23%     | <b>14</b>              | -15.47%    |
| <b>7</b>               | -7.27%     | <b>15</b>              | -7.51%     |
| <b>8</b>               | -13.16%    | Acarbose               | 99.65%     |

<sup>a</sup> The inhibition of compounds **1–15** at the final concentration of 166.7  $\mu\text{g/mL}$ , acarbose at the final concentration of 8.3  $\mu\text{g/mL}$ .

**Figure S15. GC-MS spectrum of compound 12**

E:\Data\丁文平\20220314\Z-DWP106.qgd

2022-3-15 15:40:13

Library Search

<< Target >>

Line#: 1 R.Time: 21.400 (Scan#: 2321) MassPeaks: 406

RawMode: Single 21.400 (2321) BasePeak: 55.00 (10000)

BG Mode: Averaged 23.110-23.365 (2549-2583) Group 1 - Event 1

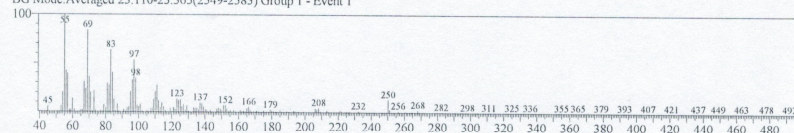

Hit#: 1 Entry: 167 Library: 自建手性香料库.lib

SI: 95 Formula: C16H30O2 CAS: 373-49-9 MolWeight: 254 RetIndex: 0

CompName: 9-Hexadecenoic acid, (9Z)- 棕榈油酸

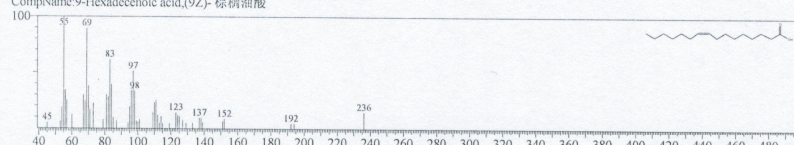

Hit#: 2 Entry: 25042 Library: NIST11s.lib

SI: 95 Formula: C18H34O2 CAS: 112-79-8 MolWeight: 282 RetIndex: 2175

CompName: 9-Octadecenoic acid, (E)- 9-十八烯酸

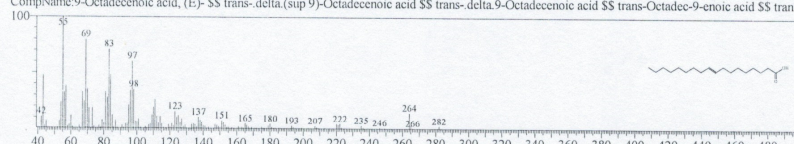

Hit#: 3 Entry: 25043 Library: NIST11s.lib

SI: 95 Formula: C18H34O2 CAS: 112-80-1 MolWeight: 282 RetIndex: 2175

CompName: Oleic Acid 9-Octadecenoic acid (Z)- 9-十八烯酸

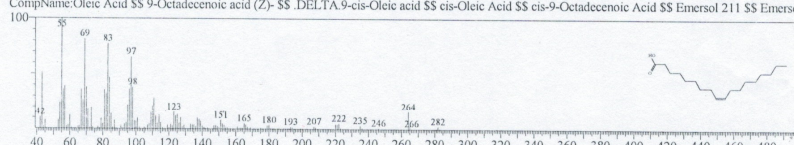

Hit#: 4 Entry: 82704 Library: NIST11s.lib

SI: 94 Formula: C16H30O2 CAS: 373-49-9 MolWeight: 254 RetIndex: 1976

CompName: Palmitoleic acid 9-Hexadecenoic acid (Z)- 9-十六烯酸

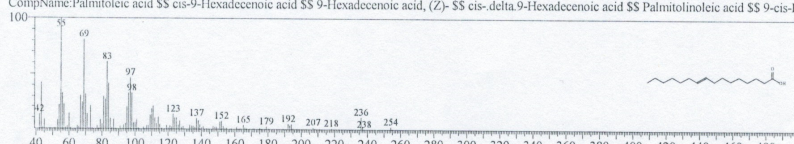

Hit#: 5 Entry: 168 Library: 自建手性香料库.lib

SI: 94 Formula: C18H34O2 CAS: 112-80-1 MolWeight: 282 RetIndex: 0

CompName: Oleic acid 油酸

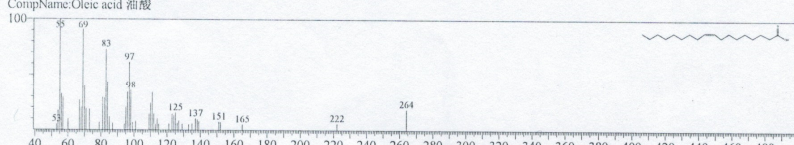



Figure S16. GC-MS spectrum of compound 13

E:\Data\丁文平\20220314\Z-DWP107.qgd

2022-3-15 15:42:30

Library Search

<< Target >>

Line# 1 R Time: 22.360 (Scan#: 2449) MassPeaks: 378

RawMode: Single 22.360 (2449) BasePeak: 55.00 (100000)

BG Mode: Averaged 23.245-23.403 (2567-2588) Group 1 - Event 1

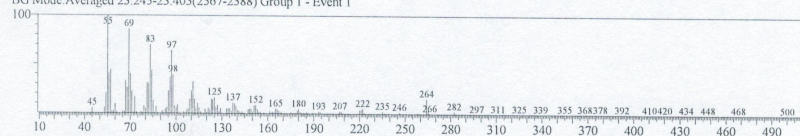

Hit# 1 Entry: 25043 Library: NIST11s.lib

SI: 97 Formula: C18H34O2 CAS: 112-80-1 MolWeight: 282 RetIndex: 2175

CompName: Oleic Acid \$S\$ 9-Octadecenoic acid (Z)- \$S\$ DELTA-9-cis-Oleic acid \$S\$ cis-Oleic Acid \$S\$ cis-9-Octadecenoic Acid \$S\$ Emersol 211 \$S\$ Emersol

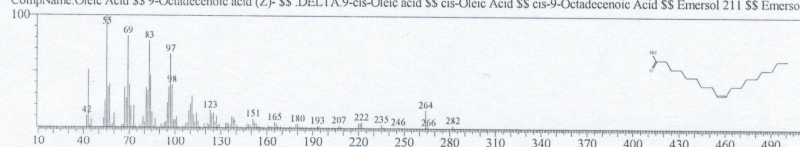

Hit# 2 Entry: 168 Library: 自建手性香料库.lib

SI: 97 Formula: C18H34O2 CAS: 112-80-1 MolWeight: 282 RetIndex: 0

CompName: Oleic acid 油酸

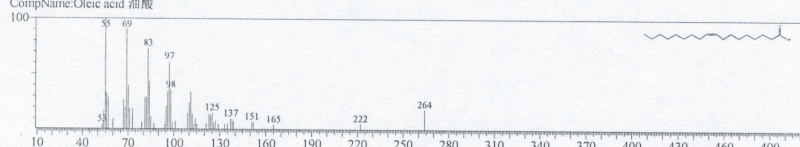

Hit# 3 Entry: 25042 Library: NIST11s.lib

SI: 96 Formula: C18H34O2 CAS: 112-79-8 MolWeight: 282 RetIndex: 2175

CompName: 9-Octadecenoic acid, (E)- \$S\$ trans-delta (sup 9)-Octadecenoic acid \$S\$ trans-delta-9-Octadecenoic acid \$S\$ trans-Octadec-9-enoic acid \$S\$ trans-

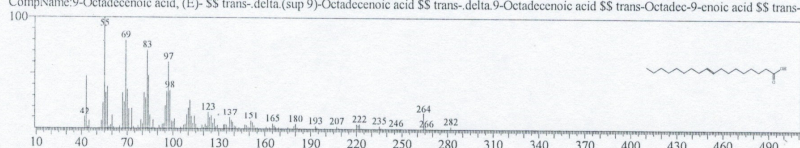

Hit# 4 Entry: 167 Library: 自建手性香料库.lib

SI: 94 Formula: C16H30O2 CAS: 373-49-9 MolWeight: 254 RetIndex: 0

CompName: 9-Hexadecenoic acid, (9Z)- 棕榈油酸

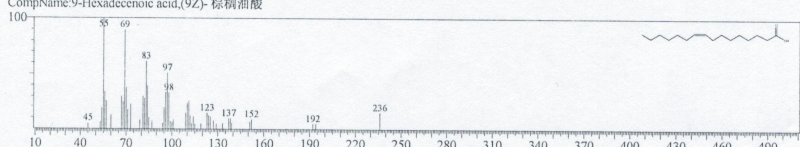

Hit# 5 Entry: 25039 Library: NIST11s.lib

SI: 93 Formula: C18H34O2 CAS: 112-80-1 MolWeight: 282 RetIndex: 2175

CompName: Oleic Acid \$S\$ 9-Octadecenoic acid (Z)- \$S\$ DELTA-9-cis-Oleic acid \$S\$ cis-Oleic Acid \$S\$ cis-9-Octadecenoic Acid \$S\$ Emersol 211 \$S\$ Emersol

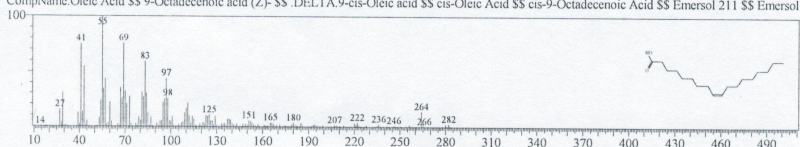



**Figure S17. GC-MS spectrum of compound 14**

E:\Data\丁文平\20220314\Z-DWP104.qgd

2022-3-15 15:37:21

Library Search

<< Target >>

Line#:1 R.Time:21.925(Scan#:2391) MassPeaks:321

RawMode:Single 21.925(2391) BasePeak:55.00(10000)

BG Mode:Averaged 26.283-26.823(2972-3044) Group 1 - Event 1

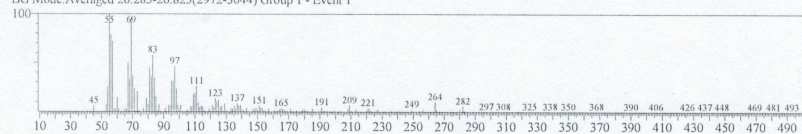

Hit#:1 Entry:25039 Library:NIST11s.lib

SI:92 Formula:C18H34O2 CAS:112-80-1 MolWeight:282 RetIndex:2175

CompName:Oleic Acid \$S\$ 9-Octadecenoic acid (Z)- \$S\$ .DELTA.9-cis-Oleic acid \$S\$ cis-Oleic Acid \$S\$ cis-9-Octadecenoic Acid \$S\$ Emersol 211 \$S\$ Emersol

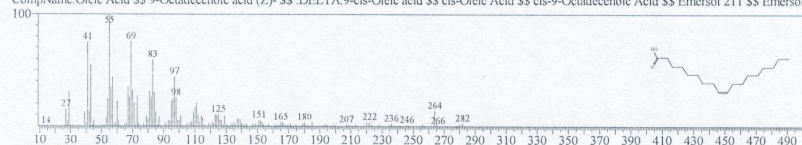

Hit#:2 Entry:104402 Library:NIST11s.lib

SI:91 Formula:C18H34O2 CAS:593-39-5 MolWeight:282 RetIndex:2175

CompName:6-Octadecenoic acid, (Z)- \$S\$ (6Z)-6-Octadecenoic acid # \$S\$ cis-6-Octadecenoic acid \$S\$ (Z)-Octadec-6-enoic acid \$S\$ Petroselinic acid \$S\$

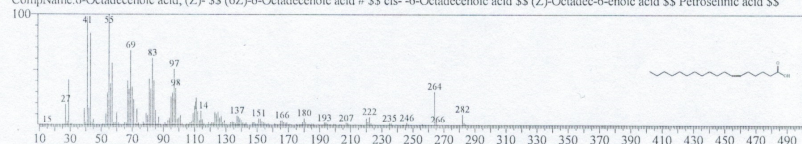

Hit#:3 Entry:25043 Library:NIST11s.lib

SI:90 Formula:C18H34O2 CAS:112-80-1 MolWeight:282 RetIndex:2175

CompName:Oleic Acid \$S\$ 9-Octadecenoic acid (Z)- \$S\$ .DELTA.9-cis-Oleic acid \$S\$ cis-Oleic Acid \$S\$ cis-9-Octadecenoic Acid \$S\$ Emersol 211 \$S\$ Emersol

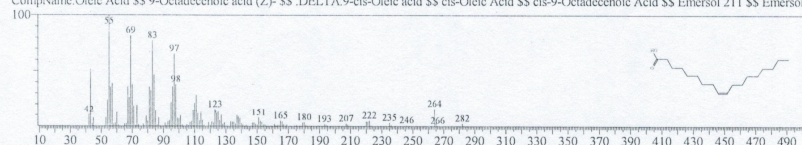

Hit#:4 Entry:25042 Library:NIST11s.lib

SI:90 Formula:C18H34O2 CAS:112-79-8 MolWeight:282 RetIndex:2175

CompName:9-Octadecenoic acid, (E)- \$S\$ trans- delta.9-Octadecenoic acid \$S\$ trans- delta.9-Octadecenoic acid \$S\$ trans-Octadec-9-enoic acid \$S\$ trans-

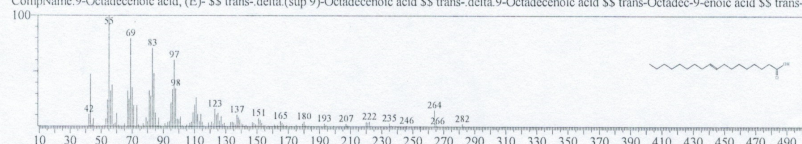

Hit#:5 Entry:168 Library:自建手性香料库.lib

SI:90 Formula:C18H34O2 CAS:112-80-1 MolWeight:282 RetIndex:0

CompName:Oleic acid 油酸

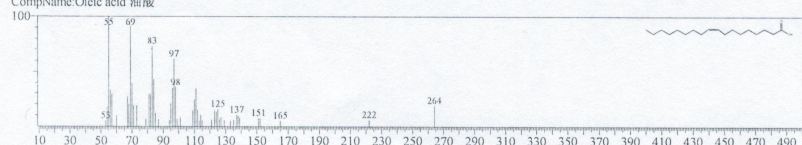



**Figure S18. GC-MS spectrum of compound 15**

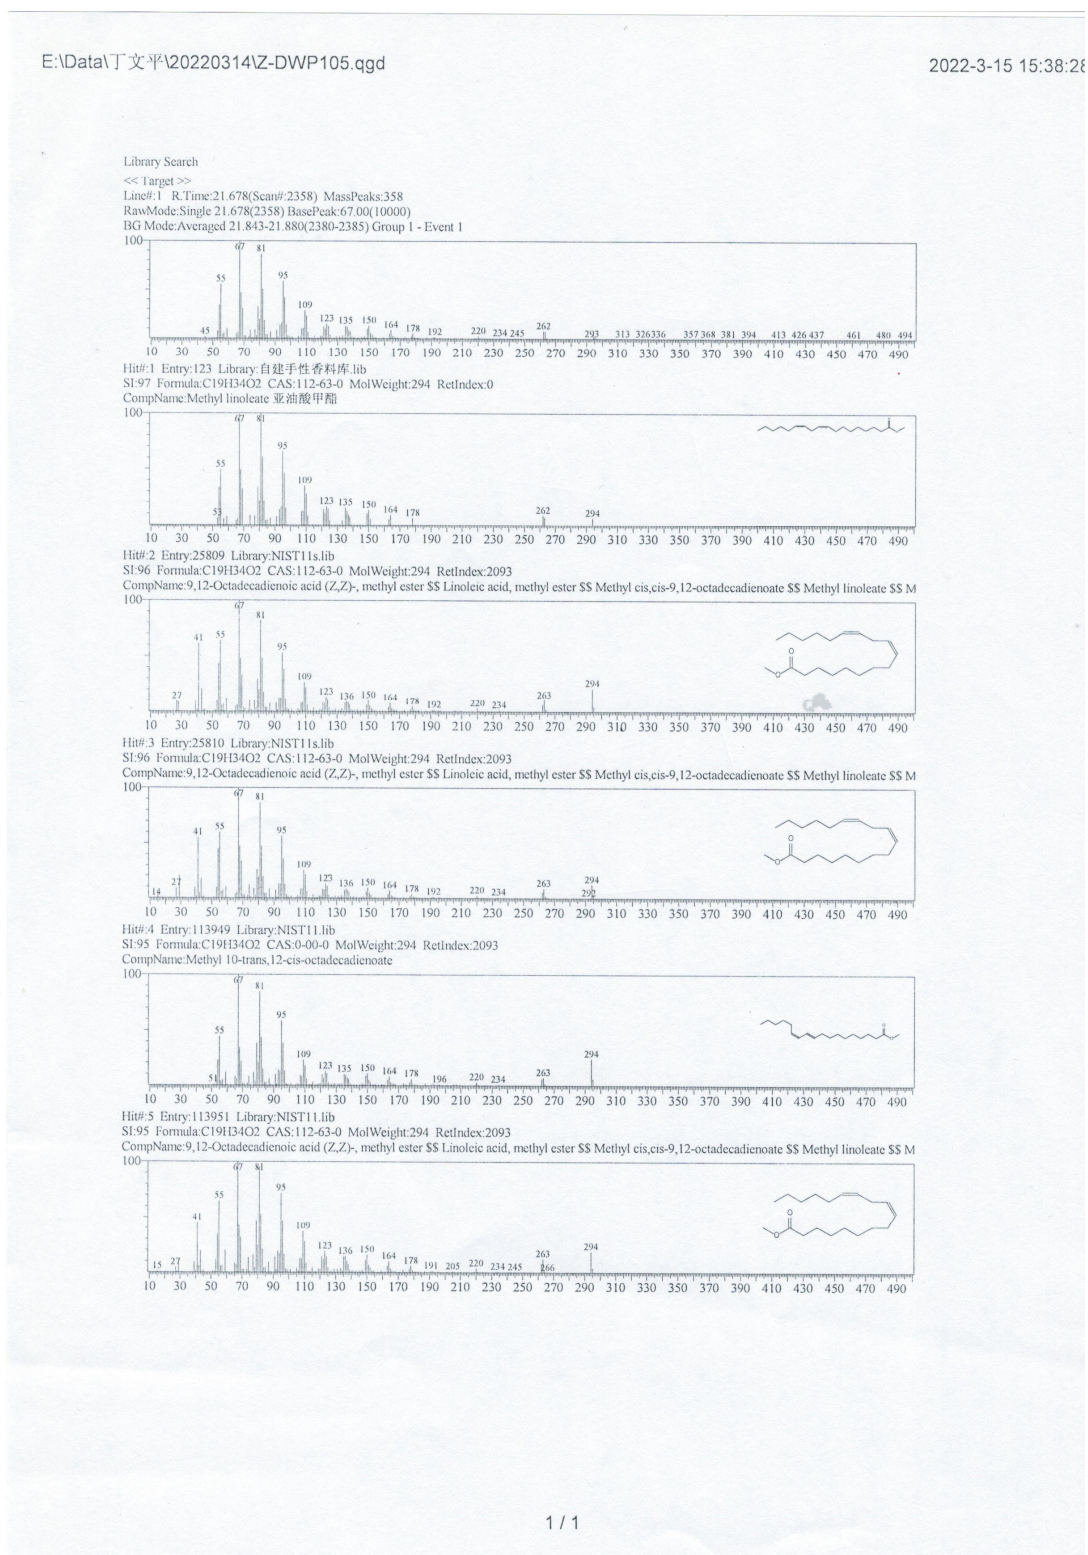

**Figure S19.** HPLC analysis profiles of Marfey's derivatives of **1**, **2**, and **5–7** at 340

nm

Marfey's derivatives of **1**

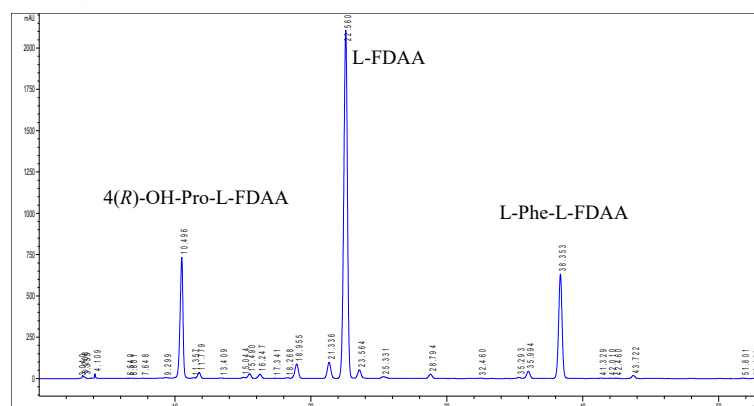

Marfey's derivatives of **2**

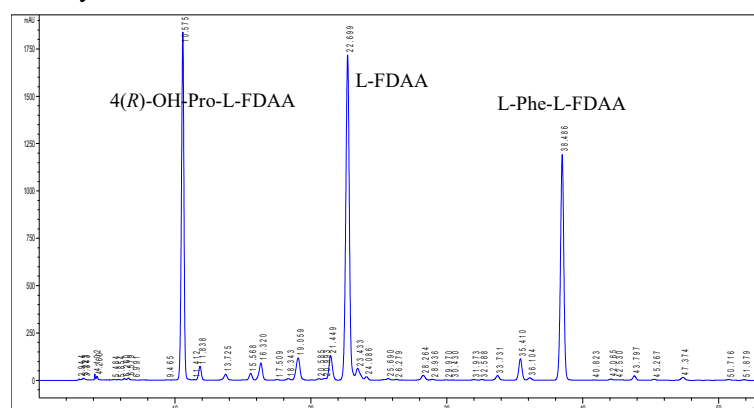

Marfey's derivatives of **5**

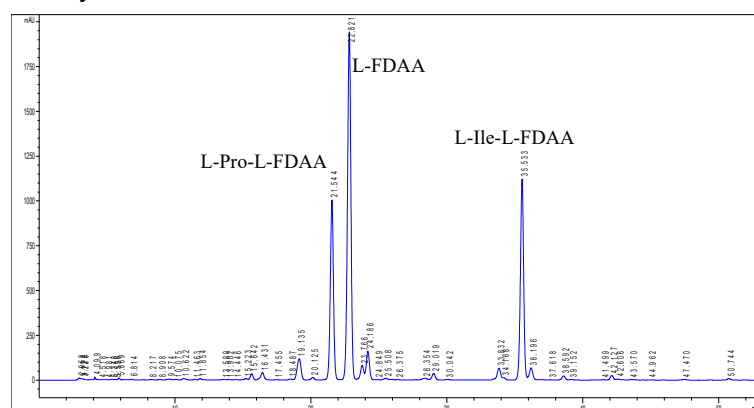

Marfey's derivatives of **6**

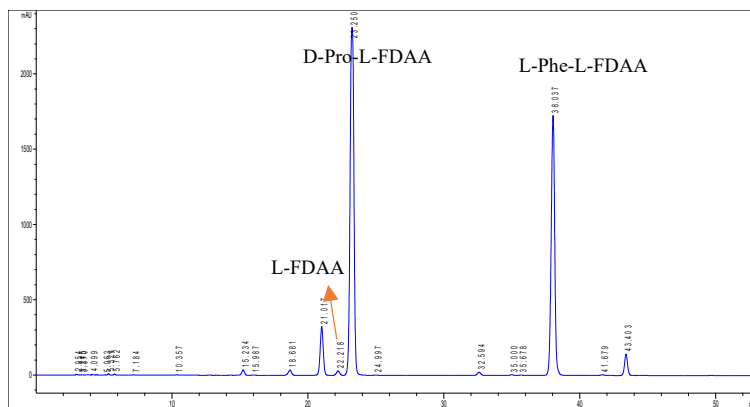

Marfey's derivatives of 7

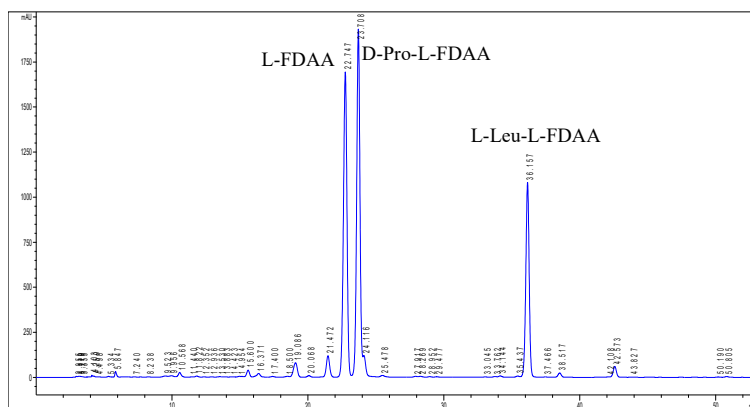

Supplement: s1 [file s1]
